# Supplementary material for: Crystallographic elucidation of an aluminium-bound amido Schiff base chemosensor: a selective turn-on fluorescent chemosensor for Al3+ ions
Source: Royal Society of Chemistry journal article supplement (doi:10.1039/d3dt01512b), 2023-01-01
Supplement: d3dt01512b1.pdf [file d3dt01512b1.pdf]

## **Crystallographic Elucidation of Aluminium Bound Amido Schiff Base Chemosensor: A Selective Turn-on Fluorescent Chemosensor for Al<sup>3+</sup> ion**

Anamika Hoque,<sup>a</sup> Md. Sanaul Islam,<sup>a</sup> Samim Khan,<sup>a</sup> Basudeb Datta,<sup>a</sup> Ennio Zangrando<sup>b\*</sup>, Goutam Kumar Kole<sup>c\*</sup>, Md. Akhtarul Alam<sup>a\*</sup>

<sup>a</sup>Department of Chemistry, Aliah University, Action Area IIA/27, New Town, Kolkata 700160, India.

<sup>b</sup>Department of Chemical and Pharmaceutical Sciences, University of Trieste, Via L. Giorgieri 1, 34127 Trieste, Italy.

<sup>c</sup>Department of Chemistry, SRM Institute of Science and Technology, Kattankulathur, Tamil Nadu 603203, India.

E-mail: ezangrado@units.it (E.Z.), goutamks@srmist.edu.in and alam\_iitg@yahoo.com (M.A.A.)

## Table of Contents

|                                                            |     |
|------------------------------------------------------------|-----|
| 1. Crystal structure.....                                  | S3  |
| 2. Powder X-ray diffraction (PXRD).....                    | S7  |
| 3. UV-vis spectra.....                                     | S8  |
| 4. Fluorescence spectra.....                               | S8  |
| 5. Benesi-Hildebrand Plot .....                            | S10 |
| 6. Detection limit .....                                   | S11 |
| 7. <sup>1</sup> H NMR titration spectra .....              | S12 |
| 8. Job's plot .....                                        | S13 |
| 9. Mass spectra.....                                       | S14 |
| 10. Effect of pH.....                                      | S15 |
| 11. Competition experiment.....                            | S16 |
| 12. UV-vis titration with Na <sub>2</sub> EDTA.....        | S17 |
| 13. Fluorescence titration with Na <sub>2</sub> EDTA ..... | S18 |
| 14. Table for crystal structure data.....                  | S19 |
| 15. Comparative table.....                                 | S23 |
| 16. References.....                                        | S24 |

1. Crystal structure:

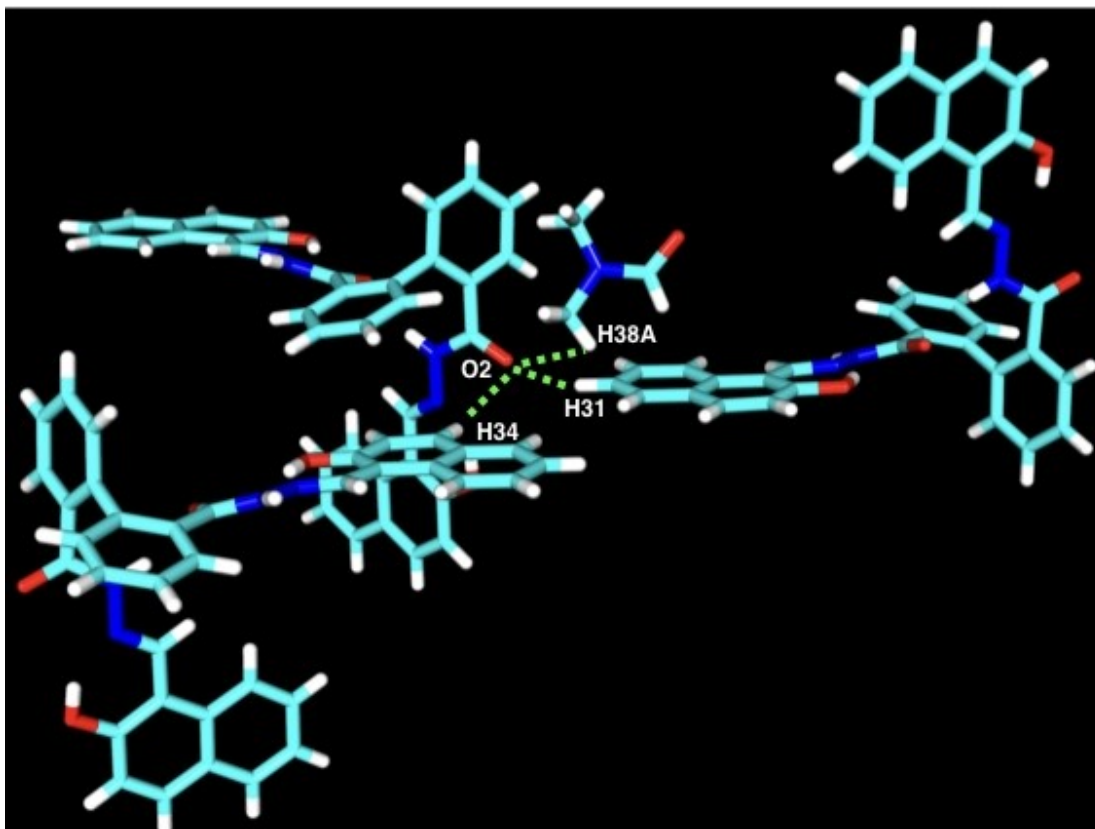

Figure S1. Perspective views of C-H...O hydrogen-bonding interactions in the crystal of sensor

1.

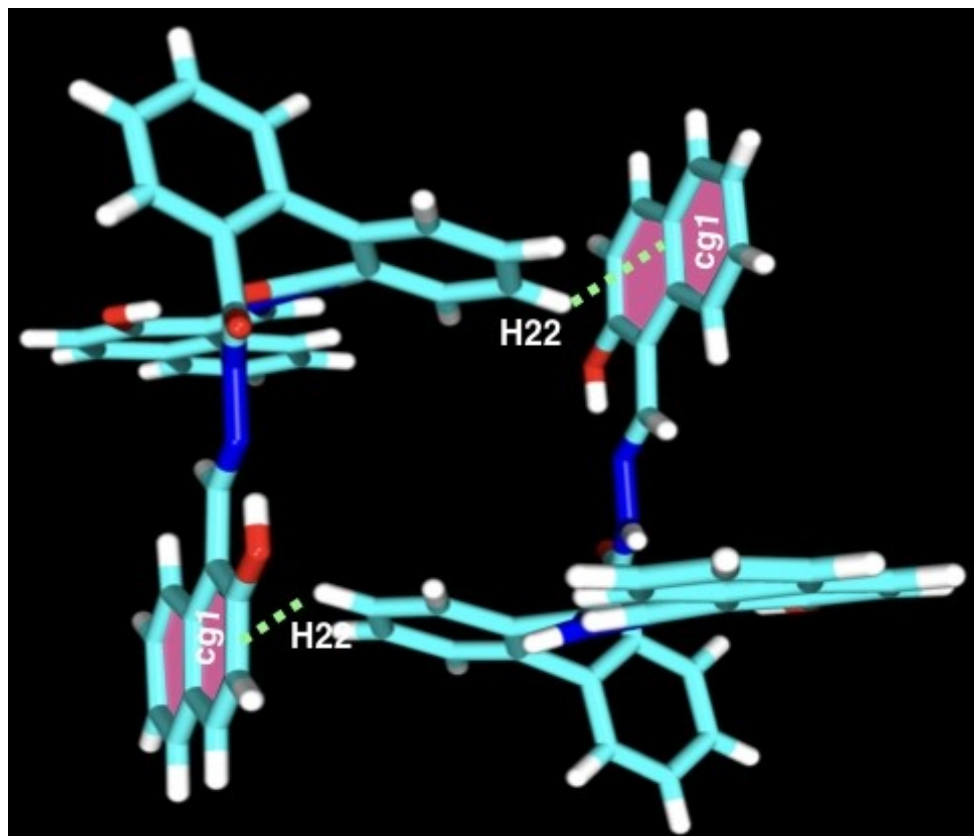

**Figure S2.** Views of C-H... $\pi$  interactions between molecules of sensor **1** arranged about an inversion center, solvents are omitted for clarity.

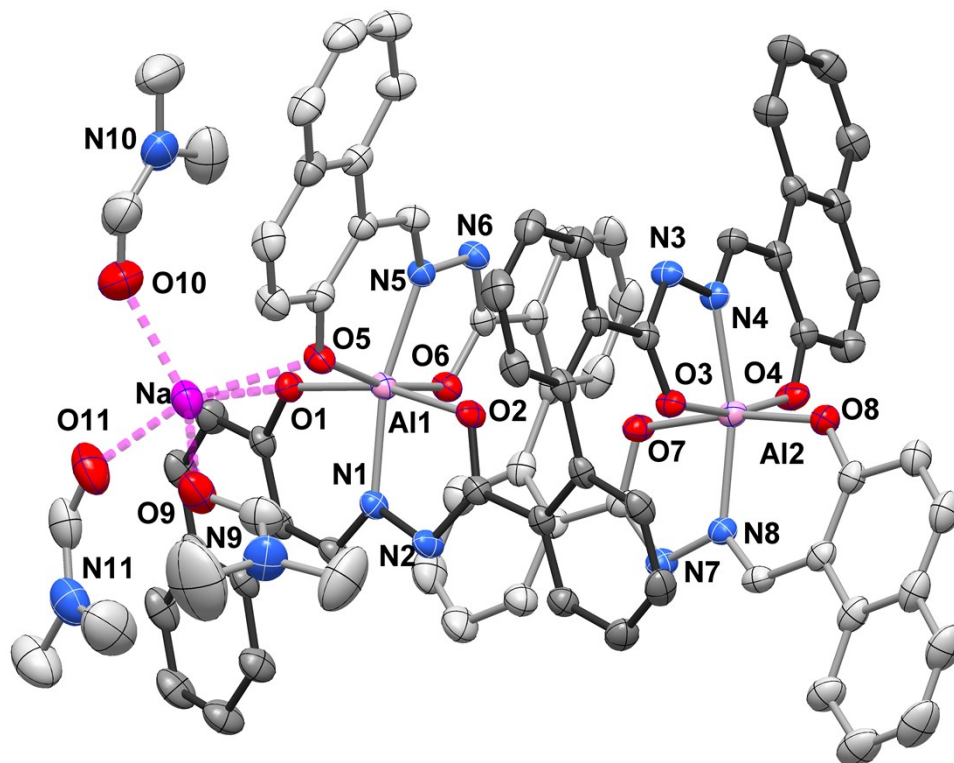

**Figure S3.** ORTEP representation of complex **1** (probability ellipsoids at 35%) with atom-numbering scheme of coordinating atoms. The two ligands are indicated in different colour. (H atoms, lattice DMF and water molecules not shown for clarity).

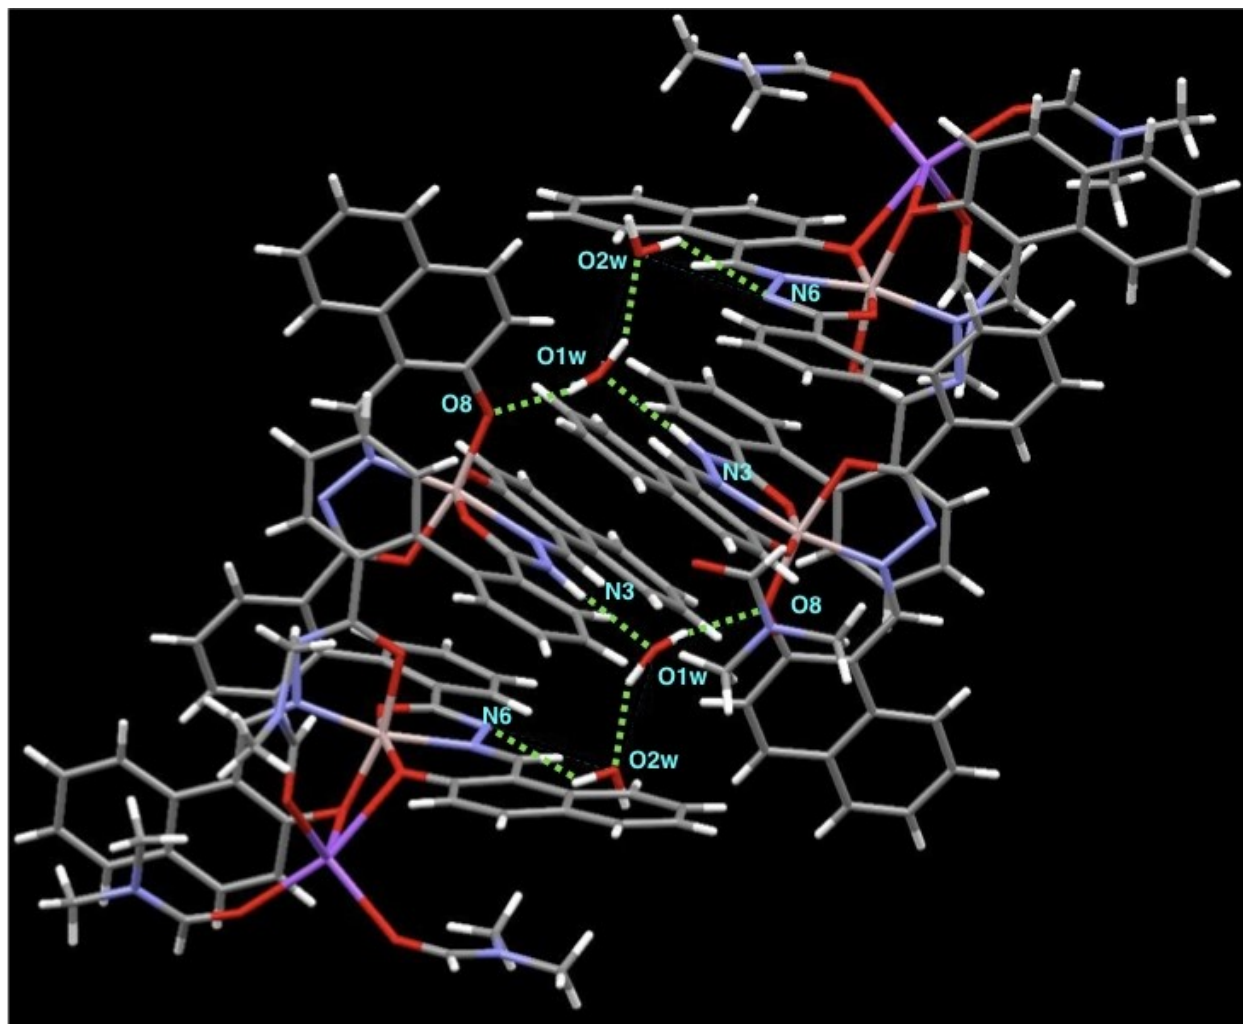

**Figure S4.** H- bonding network in complex 1 with selected atom-numbering scheme.

2. Powder X-ray diffraction (PXRD):

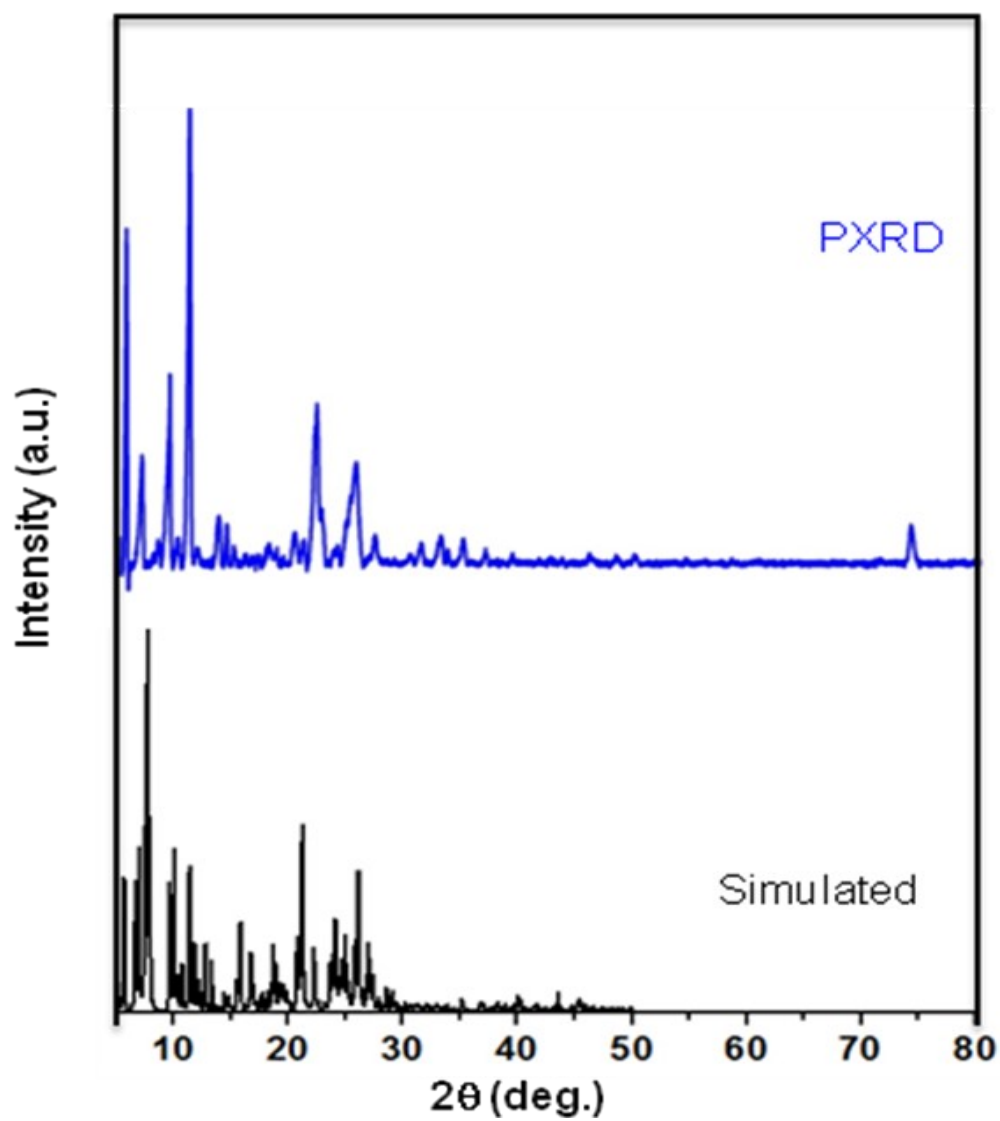

**Figure S5.** Comparison of PXRD patterns of complex **1** (blue) with the simulated pattern from the single crystal structure of complex **1** (black).

### 3. UV-vis spectra:

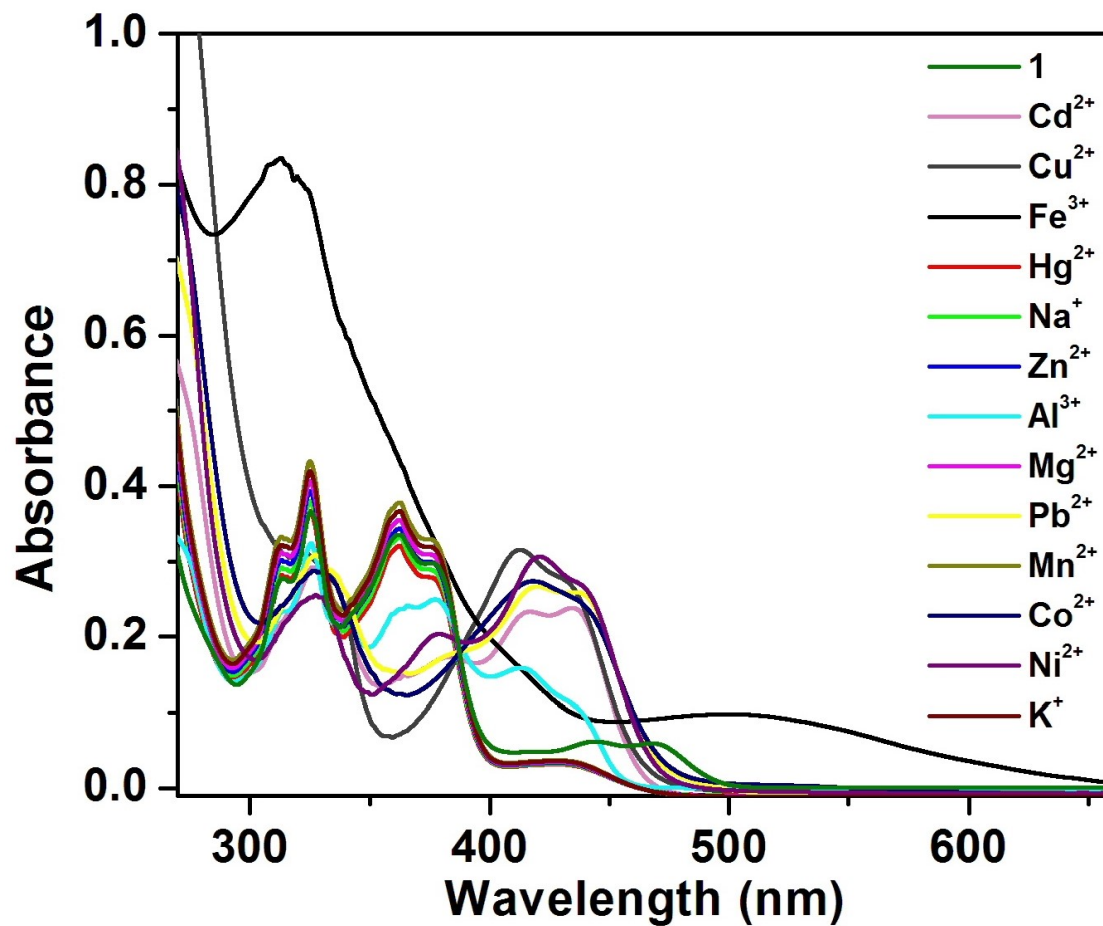

**Figure S6.** UV-vis spectra of sensor 1 ( $1 \times 10^{-5}$  M) in DMF:H<sub>2</sub>O solution (7/3, v/v) in presence of different metal ions (2 equivalents).



#### 4. Fluorescence spectra:

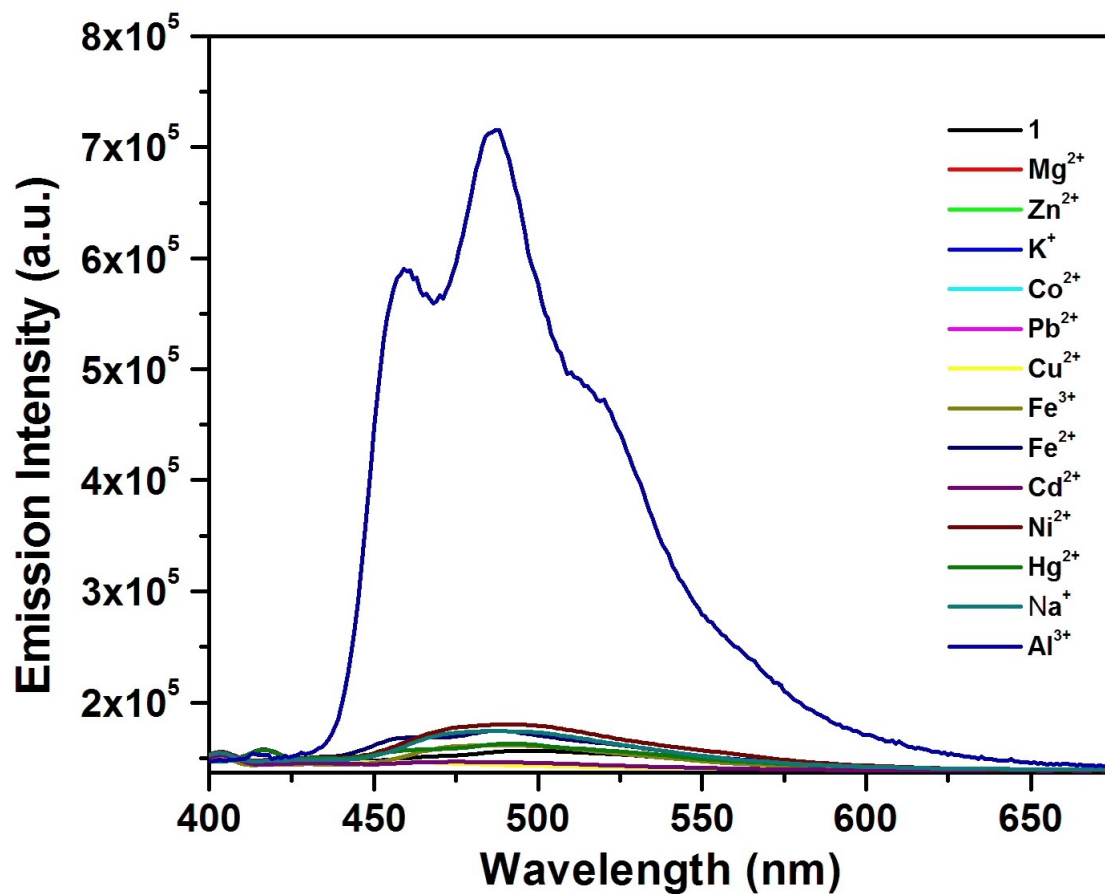

**Figure S7.** Fluorescence emission spectra of sensor **1** ( $1 \times 10^{-6}$  M) in DMF-H<sub>2</sub>O solution (7/3, v/v, in presence of different metal ions (2 equivalents) ( $\lambda_{\text{ex}} = 350$  nm).

5. Benesi-Hildebrand Plot:

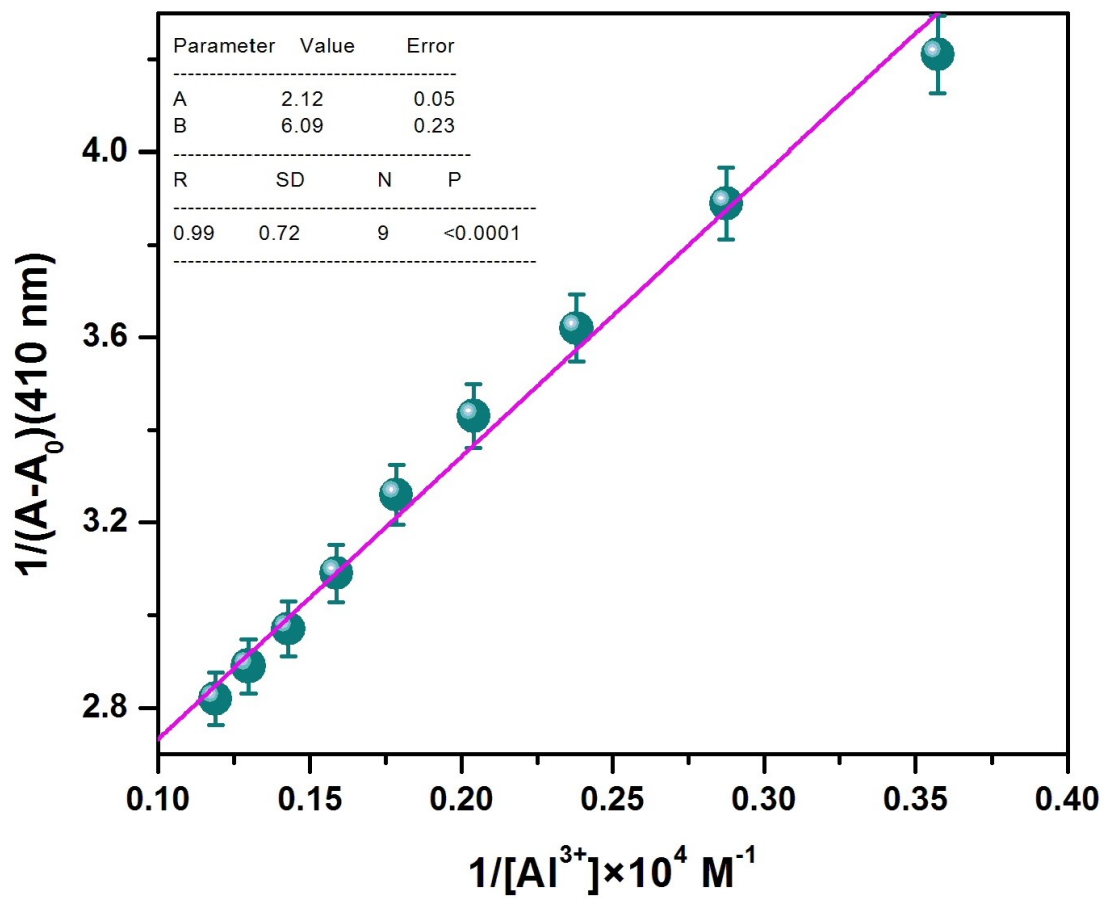

Figure S8. B-H plot for UV-Vis titration of sensor **1** with  $Al^{3+}$  ions.

6. Detection limit:

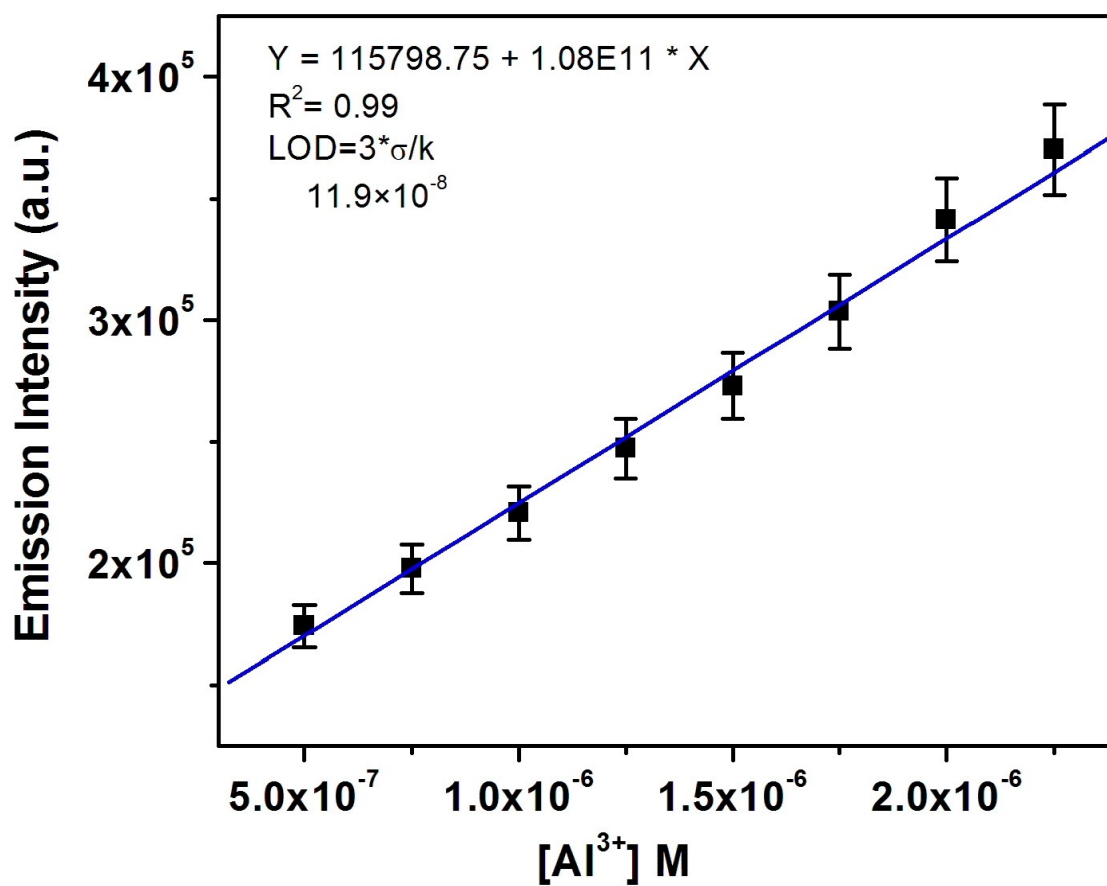

Figure S9. Detection limit of Al<sup>3+</sup> by sensor 1 based on 3σ/slope.

### 7. $^1\text{H}$ NMR titration spectra:

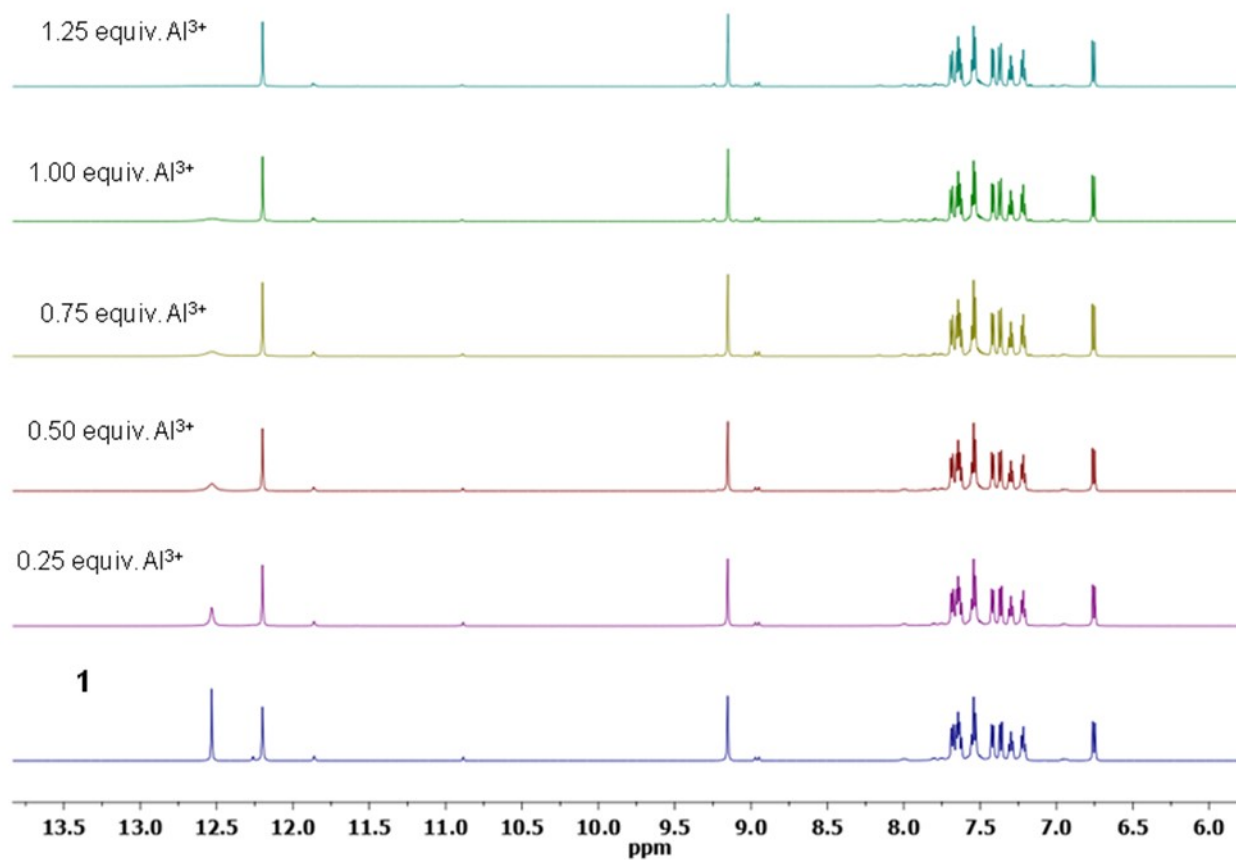

**Figure S10.** Partial  $^1\text{H}$  NMR titration spectra of sensor **1** in  $d_6$ -DMSO upon addition of different amount of  $\text{Al}^{3+}$  ions.

8. Job's plot:

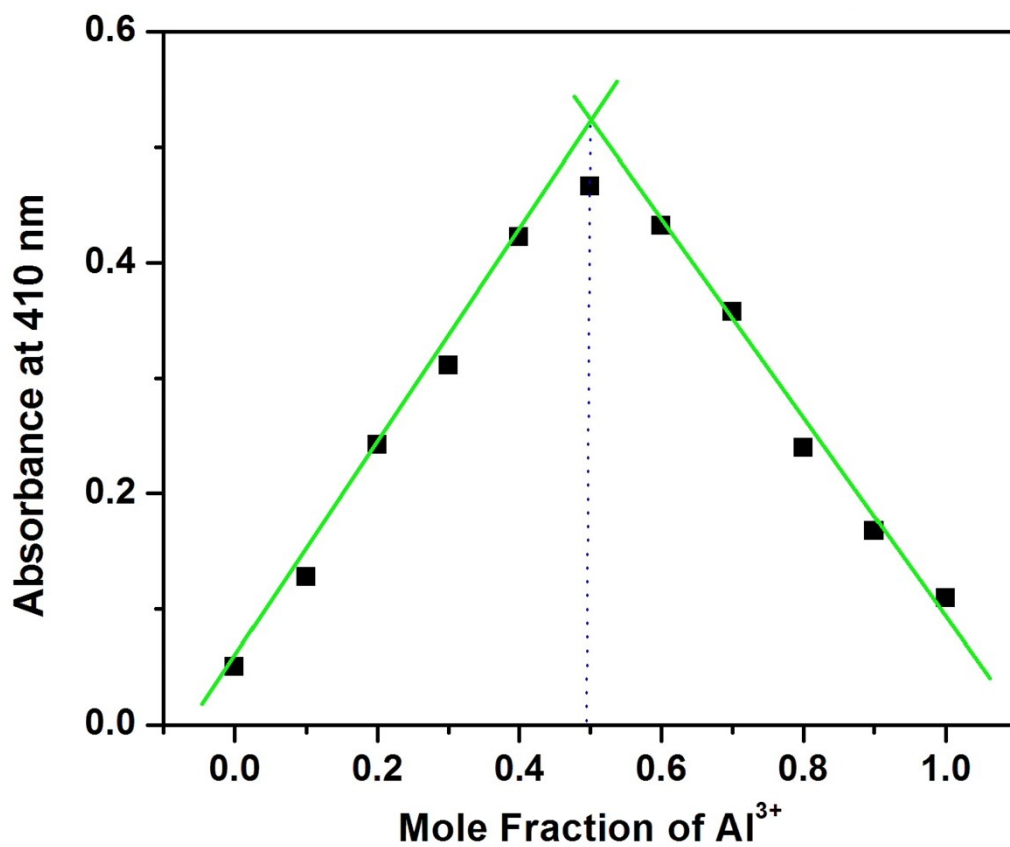

Figure S11. Job's plot for determining the stoichiometry of sensor 1 and Al<sup>3+</sup> ion in the complex.

### 9. Mass spectra:

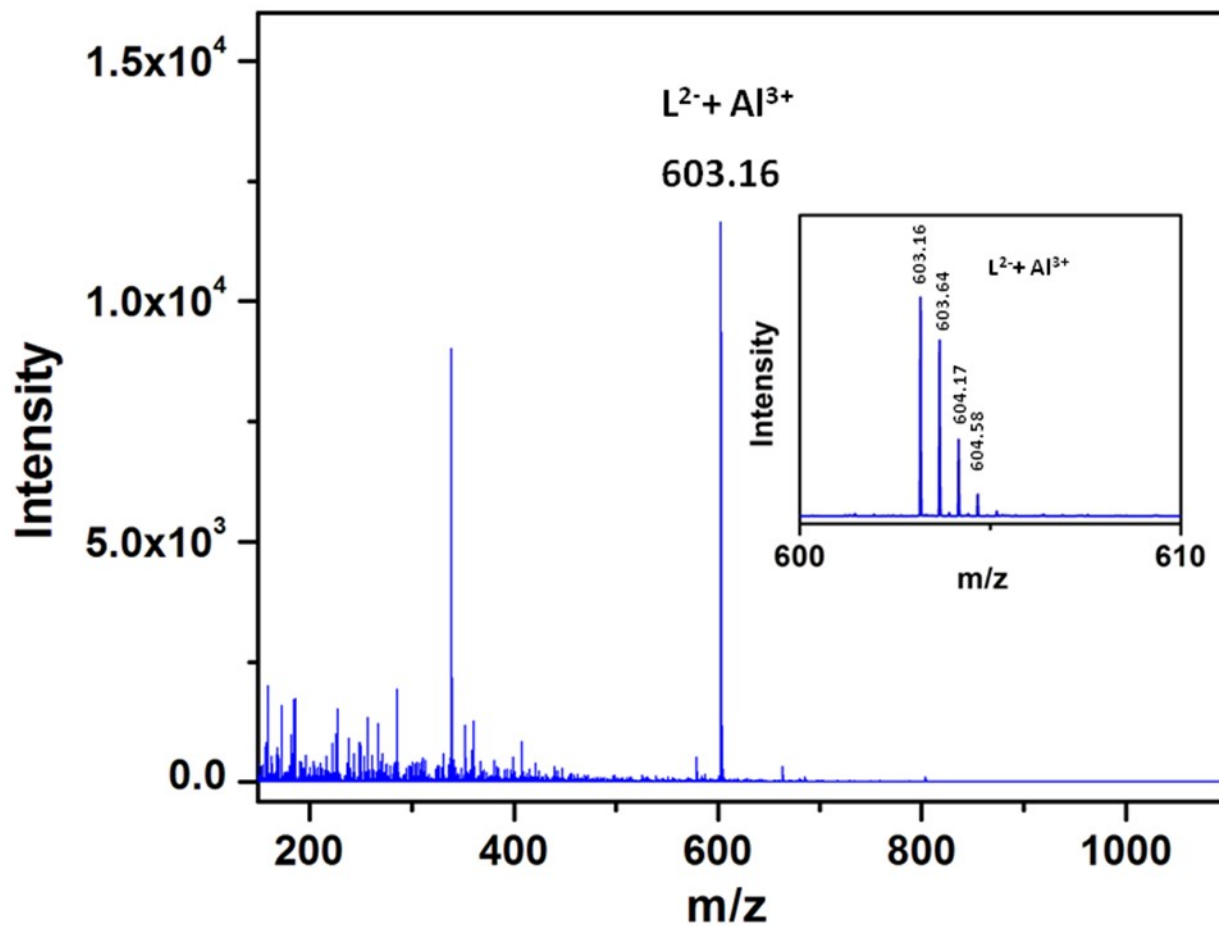

Figure S12. Mass spectrum of complex formed between sensor 1 and  $\text{Al}^{3+}$  ion.

### 10. Effect of pH:

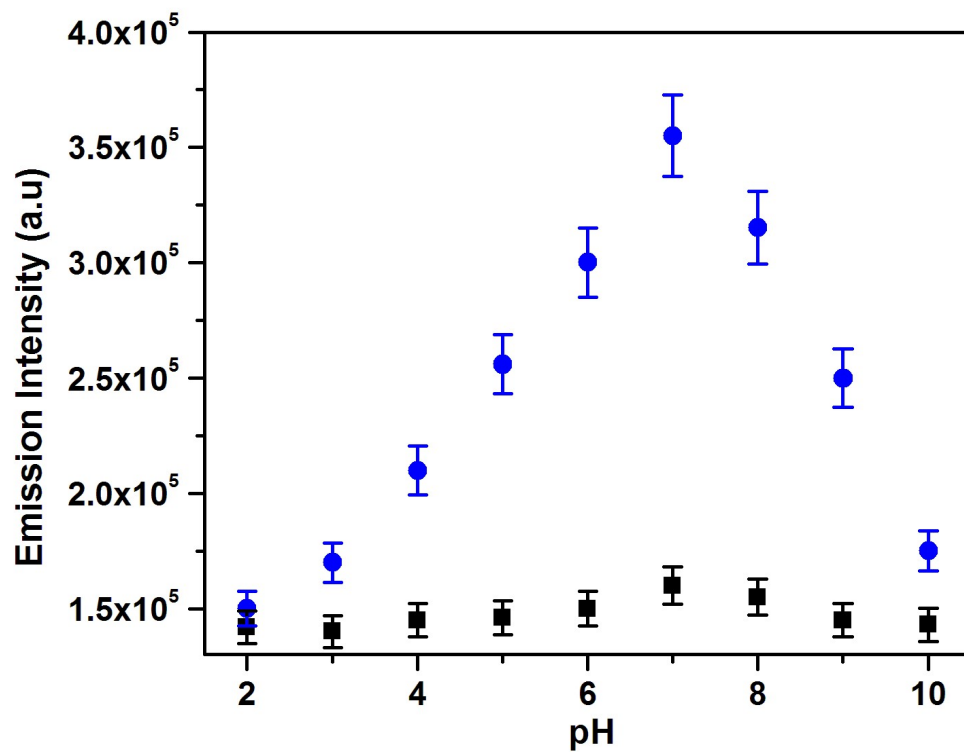

**Figure S13.** Change in fluorescence intensity sensor 1 ( $1 \times 10^{-6}$  M) (■) and its Al<sup>3+</sup> (●) complex at different pH values.

## 11. Competition experiment:

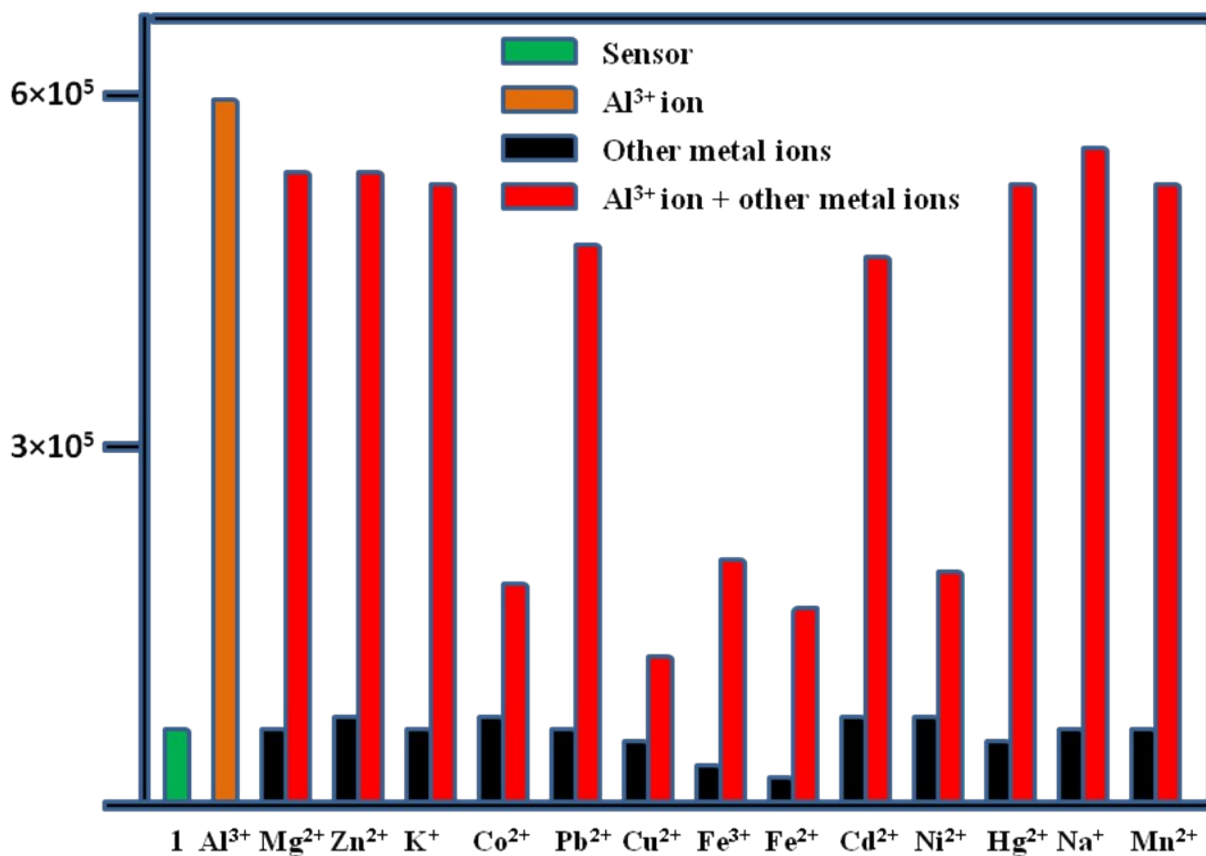

**Figure S14.** Competition experiments of sensor 1: plot of fluorescence intensity at 487 nm of sensor 1 with addition of 2.0 equiv. of  $\text{Al}^{3+}$ , and then 5.0 equiv. of various metal ions, ( $\lambda_{\text{ex}}$ : 350 nm).



## 12. UV-Vis titration with Na<sub>2</sub>EDTA:

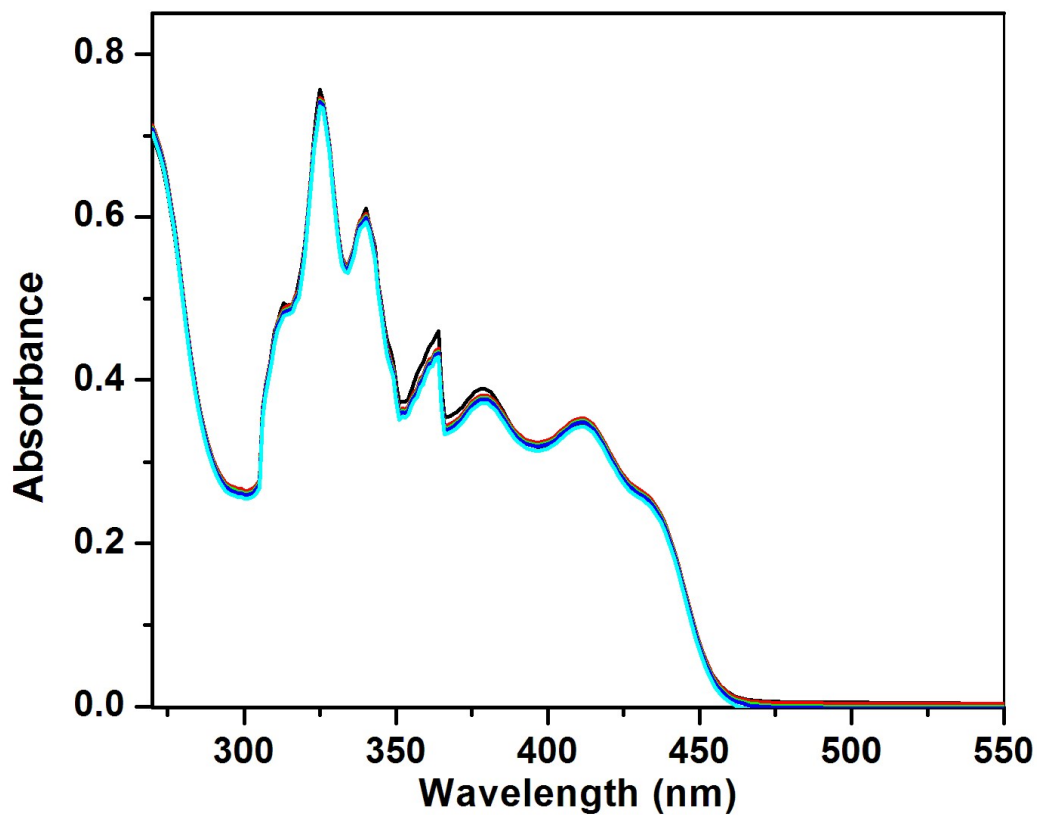

**Figure S15.** UV-Vis titration of complex **1** with Na<sub>2</sub>EDTA (0-5 equivalents) in DMF- H<sub>2</sub>O solvent (v/v, 7:3).

### 13. Fluorescence titration with Na<sub>2</sub>EDTA:

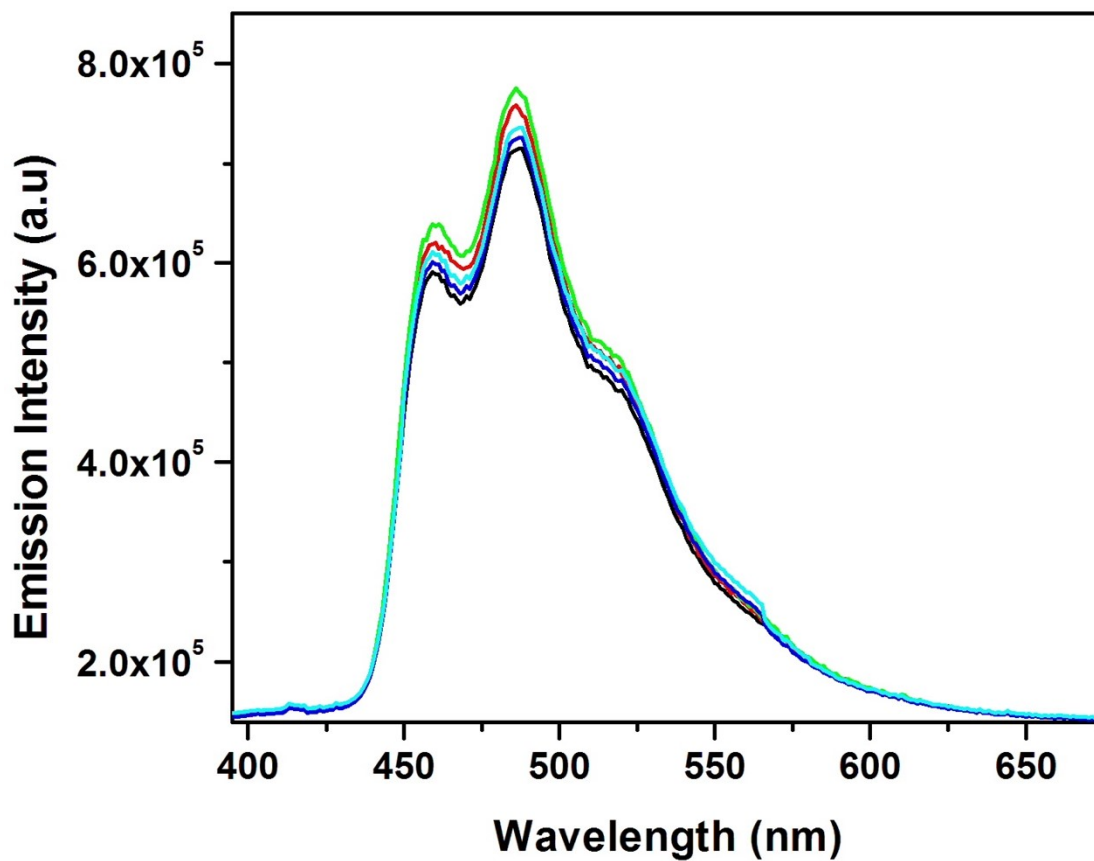

**Figure S16.** Fluorescence titration of complex **1** in DMF- H<sub>2</sub>O solvent (v/v, 7:3) upon addition of (0-5 equivalents) of Na<sub>2</sub>EDTA.

## 14. Table for crystal structure data:

**Table S1.** Crystal data and structure refinement for Sensor 1 and Complex 1

|                                                     | Sensor 1                                                      | Complex 1                                                                         |
|-----------------------------------------------------|---------------------------------------------------------------|-----------------------------------------------------------------------------------|
| CCDC No.                                            | 2260347                                                       | 2260348                                                                           |
| Empirical formula                                   | C <sub>39</sub> H <sub>35</sub> N <sub>5</sub> O <sub>6</sub> | C <sub>84</sub> H <sub>77</sub> Al <sub>2</sub> N <sub>12</sub> NaO <sub>14</sub> |
| Formula weight                                      | 669.72                                                        | 1518.97                                                                           |
| Temperature/ K                                      | 150                                                           | 273                                                                               |
| Crystal system                                      | monoclinic                                                    | triclinic                                                                         |
| Crystal colour                                      | colourless                                                    | light yellow                                                                      |
| Space group                                         | <i>I</i> 2/a                                                  | <i>P</i> -1                                                                       |
| <i>a</i> / Å                                        | 19.0312(6)                                                    | 14.5165(4)                                                                        |
| <i>b</i> / Å                                        | 15.6836(5)                                                    | 16.0763(5)                                                                        |
| <i>c</i> / Å                                        | 24.3420(6)                                                    | 18.1614(5)                                                                        |
| $\alpha$ / °                                        | 90                                                            | 81.998(1)                                                                         |
| $\beta$ / °                                         | 110.365(3)                                                    | 69.664(1)                                                                         |
| $\gamma$ / °                                        | 90                                                            | 75.218(1)                                                                         |
| Volume/ Å <sup>3</sup>                              | 6811.4(4)                                                     | 3836.68(19)                                                                       |
| <i>Z</i>                                            | 8                                                             | 2                                                                                 |
| $\rho_{\text{calc}}$ /cm <sup>3</sup>               | 1.306                                                         | 1.346                                                                             |
| $\mu$ / mm <sup>-1</sup>                            | 0.090                                                         | 0.119                                                                             |
| F(000)                                              | 2816                                                          | 1628                                                                              |
| Index Ranges                                        |                                                               |                                                                                   |
| <i>h</i>                                            | -24 ≤ <i>h</i> ≤ 24                                           | -17 ≤ <i>h</i> ≤ 17                                                               |
| <i>k</i>                                            | -20 ≤ <i>k</i> ≤ 20                                           | -19 ≤ <i>k</i> ≤ 19                                                               |
| <i>l</i>                                            | -31 ≤ <i>l</i> ≤ 31                                           | -22 ≤ <i>l</i> ≤ 22                                                               |
| Reflections collected                               | 12675                                                         | 117151                                                                            |
| Independent reflections                             | 7397                                                          | 14556                                                                             |
| Parameters refined                                  | 461                                                           | 998                                                                               |
| Goodness-of-fit on F <sup>2</sup>                   | 1.050                                                         | 1.067                                                                             |
| Final R1, wR2 indexes [ <i>I</i> > 2σ ( <i>I</i> )] | 0.0569, 0.1355                                                | 0.0837, 0.1996                                                                    |
| Final R1, wR2 indexes [all data]                    | 0.0801, 0.1553                                                | 0.1185, 0.2233                                                                    |
| Residuals/ e. Å <sup>-3</sup>                       | 0.302, -0.239                                                 | 1.065, -0.998                                                                     |

**Table S2.** Selected bond distances (Å) and angles (°) for sensor **1** and complex **1**

| Bond distances of Sensor 1  |            |                 |            |
|-----------------------------|------------|-----------------|------------|
| O(1)-C(1)                   | 1.349(3)   | O(3)-C(25)      | 1.228(2)   |
| O(2)-C(12)                  | 1.226(2)   | O(4)-C(36)      | 1.358(3)   |
| N(1)-C(11)                  | 1.278(3)   | N(3)-C(25)      | 1.367(3)   |
| N(2)-C(12)                  | 1.355(3)   | N(4)-C(26)      | 1.290(3)   |
| Bond distances of Complex 1 |            |                 |            |
| Al(1)-O(1)                  | 1.882(3)   | Al(2)-O(3)      | 1.957(3)   |
| Al(1)-O(2)                  | 1.904(3)   | Al(2)-O(4)      | 1.833(3)   |
| Al(1)-O(5)                  | 1.855(3)   | Al(2)-O(7)      | 1.877(3)   |
| Al(1)-O(6)                  | 1.880(3)   | Al(2)-O(8)      | 1.845(3)   |
| Al(1)-N(1)                  | 1.986(3)   | Al(2)-N(4)      | 1.993(3)   |
| Al(1)-N(5)                  | 1.991(3)   | Al(2)-N(8)      | 1.956(3)   |
| O(1)-Na                     | 2.518(3)   | O(10)-Na        | 2.288(5)   |
| O(5)-Na                     | 2.407(3)   | O(11)-Na        | 2.248(4)   |
| O(9)-Na                     | 2.352(5)   | Al(1)-Na        | 3.391(2)   |
| Bond angles of Complex 1    |            |                 |            |
| O(5)-Al(1)-O(6)             | 165.76(13) | O(4)-Al(2)-O(8) | 89.75(13)  |
| O(5)-Al(1)-O(1)             | 86.88(12)  | O(4)-Al(2)-O(7) | 92.29(13)  |
| O(6)-Al(1)-O(1)             | 91.08(12)  | O(8)-Al(2)-O(7) | 169.62(13) |
| O(5)-Al(1)-O(2)             | 92.31(12)  | O(4)-Al(2)-N(8) | 103.89(13) |
| O(6)-Al(1)-O(2)             | 93.32(12)  | O(8)-Al(2)-N(8) | 89.71(13)  |
| O(1)-Al(1)-O(2)             | 164.68(12) | O(7)-Al(2)-N(8) | 79.92(12)  |
| O(5)-Al(1)-N(1)             | 100.73(13) | O(4)-Al(2)-O(3) | 165.64(12) |
| O(6)-Al(1)-N(1)             | 93.19(12)  | O(8)-Al(2)-O(3) | 89.29(12)  |
| O(1)-Al(1)-N(1)             | 86.43(12)  | O(7)-Al(2)-O(3) | 91.23(12)  |
| O(2)-Al(1)-N(1)             | 78.68(12)  | N(8)-Al(2)-O(3) | 90.43(12)  |
| O(5)-Al(1)-N(5)             | 87.85(12)  | O(4)-Al(2)-N(4) | 87.85(12)  |
| O(6)-Al(1)-N(5)             | 79.08(12)  | O(8)-Al(2)-N(4) | 98.79(13)  |
| O(1)-Al(1)-N(5)             | 105.16(13) | O(7)-Al(2)-N(4) | 91.46(12)  |
| O(2)-Al(1)-N(5)             | 90.08(12)  | N(8)-Al(2)-N(4) | 165.59(14) |
| N(1)-Al(1)-N(5)             | 166.04(14) | O(3)-Al(2)-N(4) | 78.14(11)  |
| O(11)-Na-O(10)              | 98.30(19)  | O(9)-Na-O(5)    | 85.44(14)  |
| O(11)-Na-O(9)               | 94.07(18)  | O(11)-Na-O(1)   | 100.56(14) |
| O(10)-Na-O(9)               | 122.4(2)   | O(10)-Na-O(1)   | 109.03(15) |
| O(11)-Na-O(5)               | 158.60(15) | O(9)-Na-O(1)    | 123.45(16) |
| O(10)-Na-O(5)               | 99.99(15)  | O(5)-Na-O(1)    | 62.85(9)   |

**Table S3.** Al-O and amide C=O bond lengths (Å) in complex **1** showing the difference between the C25=O3 amide with respect to other amides.

| Aluminium atom | -C=O...Al <sup>3+</sup> | -C=O     | Carbonyl-amide<br>-C-NH |
|----------------|-------------------------|----------|-------------------------|
| Al1            | 1.904(3)                | 1.294(4) | 1.312(5)                |
|                | 1.880(3)                | 1.287(4) | 1.314(5)                |
| Al2            | 1.957(3)                | 1.251(4) | 1.341(4)                |
|                | 1.877(3)                | 1.295(4) | 1.320(5)                |

**Table S4.** Hydrogen bond parameters (Å/°) of sensor **1** and complex **1**.

| D-H...A          | D-H     | H...A     | D...A    | D-H...A | Symmetry code of A |
|------------------|---------|-----------|----------|---------|--------------------|
| <b>Sensor 1</b>  |         |           |          |         |                    |
| O1-H1...N1       | 0.84    | 1.82      | 2.554(2) | 146     | -                  |
| N2-H2N...O3      | 0.88    | 1.98      | 2.833(2) | 164     | -                  |
| N3-H3N...O5      | 0.88    | 2.04      | 2.855(3) | 154     | -                  |
| O4-H4...N4       | 0.84    | 1.83      | 2.568(2) | 145     | -                  |
| O5-H5A...O6      | 0.87(2) | 1.958(19) | 2.820(3) | 169(4)  | -                  |
| O5-H5B...O6      | 0.88(2) | 2.013(18) | 2.868(2) | 163(3)  | 1/2-x,3/2-y,1/2-z  |
| <b>Complex 1</b> |         |           |          |         |                    |
| N3-H3N...O1w     | 0.89    | 1.96      | 2.848(4) | 174     | -                  |
| O1w-H11w...O8    | 0.85    | 2.07      | 2.908(4) | 168     | 1-x,1-y,2-z        |
| O1w-H12w...O2w   | 0.87    | 2.08      | 2.882(6) | 151     | -                  |
| O2w-H21w...N6    | 0.91    | 2.26      | 2.937(6) | 130     | -                  |
| O2w-H22w...O10   | 0.90    | 2.716     | 3.376(6) | 131     | 1-x,1-y,1-z        |

**Table S5.** Weak interactions in complex **1**

| D-H...A        | D-H  | H...A | D...A     | D-H...A | Symmetry code<br>of A |
|----------------|------|-------|-----------|---------|-----------------------|
| C23-H23...O1w  | 0.93 | 2.59  | 3.472(6)  | 158     | -                     |
| C26-H26...O1w  | 0.93 | 2.57  | 3.347(6)  | 141     | -                     |
| C66-H66...O13  | 0.93 | 2.52  | 3.111(13) | 122     | x,-1+y,z              |
| C88-H88b...O12 | 0.96 | 2.24  | 3.171(14) | 164     | 2-x,1-y,1-z           |
| C91-H91c...O1w | 0.96 | 2.57  | 3.387(14) | 143     | 1+x,y,z               |

## 15. Comparative table:

**Table S6:** Comparative table of probes previously reported on the basis of their medium, binding constant, limit of detection and application.

|    | Analyte           | Medium        | Method       | Binding constant $K_b$ ,<br>( $M^{-1}$ ) | Detection limit<br>(M)             | Applications                        | Ref.         |
|----|-------------------|---------------|--------------|------------------------------------------|------------------------------------|-------------------------------------|--------------|
| 1  | $Al^{3+}$ , $F^-$ | DMSO/ $H_2O$  | Fluorometric | $Al^{3+}$ : $8.50 \times 10^5$           | $Al^{3+}$ : $1.05 \times 10^{-8}$  | Logic gate,<br>Live cell<br>imaging | 1            |
| 2  | $Al^{3+}$         | $CH_3OH$      | Fluorometric | $Al^{3+}$ : $3.6 \times 10^4$            | $Al^{3+}$ : $8.30 \times 10^{-7}$  | Paper strips                        | 2            |
|    | $H_3PO_4^-$       |               |              |                                          | $H_3PO_4^-$ : $1.7 \times 10^{-6}$ |                                     |              |
| 3  | $Al^{3+}$         | $CH_3OH/H_2O$ | Fluorometric | $5.42 \times 10^5$                       | $3.55 \times 10^{-7}$              | Paper strips<br>Logic gate          | 3            |
| 4  | $Al^{3+}$         | DMSO/ $H_2O$  | Fluorometric | $4.09 \times 10^4$                       | $1.20 \times 10^{-7}$              | Live cell<br>imaging                | 4            |
| 5  | $Al^{3+}$         | DMSO/ $H_2O$  | Fluorometric |                                          | $1.90 \times 10^{-6}$              | -                                   | 5            |
| 6  | $Al^{3+}$         | $CH_3OH/H_2O$ | Fluorometric | $2.85 \times 10^5$                       | $1.1 \times 10^{-7}$               | -                                   | 6            |
| 7  | $Al^{3+}$         | DMF/ $H_2O$   | Fluorometric | $2.75 \times 10^3$                       | $4.9 \times 10^{-7}$               | Paper strips                        | 7            |
| 8  | $Al^{3+}$         | $CH_3OH$      | Fluorometric | $1.6 \times 10^4$                        | $2.7 \times 10^{-7}$               | Paper strips                        | 8            |
| 9  | $Al^{3+}$         | DMSO          | Fluorometric | $1.4 \times 10^4$                        | $2.0 \times 10^{-7}$               | Paper strips                        | 9            |
| 10 | $Al^{3+}$         | DMF/ $H_2O$   | Fluorometric | $3.48 \times 10^3$                       | $11.9 \times 10^{-8}$              | Paper strips                        | This<br>work |

## 16. References:

- 1 D. Sarkar, P. Ghosh, S. Gharami, T.K. Mondal and N. Murmu, A novel coumarin based molecular switch for the sequential detection of  $\text{Al}^{3+}$  and  $\text{F}^-$ : Application in lung cancer live cell imaging and construction of logic gate, *Sens Actuators B Chem.*, 2017, **242**, 338–346.
- 2 D. Choe and C. Kim, An acylhydrazone-based fluorescent sensor for sequential recognition of  $\text{Al}^{3+}$  and  $\text{H}_2\text{PO}_4$ , *Materials*, 2021, **14**, 6392.
- 3 G. Bartwal, K. Aggarwal and J.M. Khurana, An ampyrone based azo dye as pH-responsive and chemo-reversible colorimetric fluorescent probe for  $\text{Al}^{3+}$  in semi-aqueous medium: implication towards logic gate analysis, *New J. Chem.*, 2018, **42**, 2224–2231.
- 4 A. Saravanan, S. Shyamsivappan, N. Kalagatur, T. Suresh, N. Maroli, N. Bhuvanesh, P. Kolandaivel and P. Mohan, Application of real sample analysis and biosensing: synthesis of new naphthyl derived chemosensor for detection of  $\text{Al}^{3+}$  ions, *Spectrochim. Acta A*, 2020, **241**, 118684.
- 5 R. Shanmugapriya, P. Kumar, K. Poongodi, C. Nandhini and K.P. Elango, 3-Hydroxy- 2-naphthoic hydrazide as a probe for fluorescent detection of cyanide and aluminium ions in organic and aquo-organic media and its application in food and pharmaceutical samples, *Spectrochim. Acta A*, 2021, **249**, 119315.
- 6 V. Kumar, S. Kundu, B. Sk and A. Patra, A naked-eye colorimetric sensor for methanol and ‘turn-on’ fluorescence detection of  $\text{Al}^{3+}$ , *New J. Chem.*, 2019, **43**, 18582–18589.
- 7 A. Mondal, E. Ahmmed, S. Chakraborty, A. Sarkar, S. Lohar and P. Chattopadhyay, Aggregation induced emission enhancement (AIEE) of naphthalene appended organic moiety: An  $\text{Al}^{3+}$  ion selective turn on fluorescent probe, *Chemistry Select*, 2020, **5**, 147–155.
- 8 G. Kumar, K. Paul and V. Luxami, Aggregation induced emission -excited state intramolecular proton transfer based “off-on” fluorescent sensor for  $\text{Al}^{3+}$  ions in liquid and solid state, *Sens. Actuators B. Chem.*, 2018, **263**, 585–593.
- 9 X. Mei Jiang, W.H. Mi, W. Zhu, H. Yao, Y.M. Zhang, T.B. Wei and Q. Lin, A biacylhydrazone-based chemosensor for fluorescence ‘turn-on’ detection of  $\text{Al}^{3+}$  with high selectivity and sensitivity, *Supramolecular Chemistry*, 2019, **31**, 80–88.
